# Supplementary material for: Haemorrhoidal artery ligation versus rubber band ligation for the management of symptomatic second-degree and third-degree haemorrhoids (HubBLe): a multicentre, open-label, randomised controlled trial
Source: PubMed Central journal article supplement (PMC4956910; doi:10.1016/s0140-6736(16)30584-0), 2016-07-23
Supplement: mmc1.pdf [file mmc1.pdf]

# THE LANCET

## Supplementary appendix

This appendix formed part of the original submission and has been peer reviewed. We post it as supplied by the authors.

Supplement to: Brown SR, Tiernan JP, Watson AJM, et al, and The HubBLLe Study team. Haemorrhoidal artery ligation versus rubber band ligation for the management of symptomatic second-degree and third-degree haemorrhoids (HubBLLe): a multicentre, open-label, randomised controlled trial. *Lancet* 2016; published online May 25. [http://dx.doi.org/10.1016/S0140-6736\(16\)30584-0](http://dx.doi.org/10.1016/S0140-6736(16)30584-0).

Patient response at 12 months to the primary outcome question:  
'At the moment, do you feel your symptoms from your haemorrhoids are:  
1. Cured or improved compared with before starting treatment; or,  
2. Unchanged or worse compared with before starting treatment?'

1. Cured or improved compared with before starting treatment

2. Unchanged or worse compared with before starting treatment

Did the patient have any subsequent procedure over the 12 months?

No

Yes

Recurrence

Did the patient have any symptoms or events that strongly indicated recurrence?

No

Yes

No recurrence

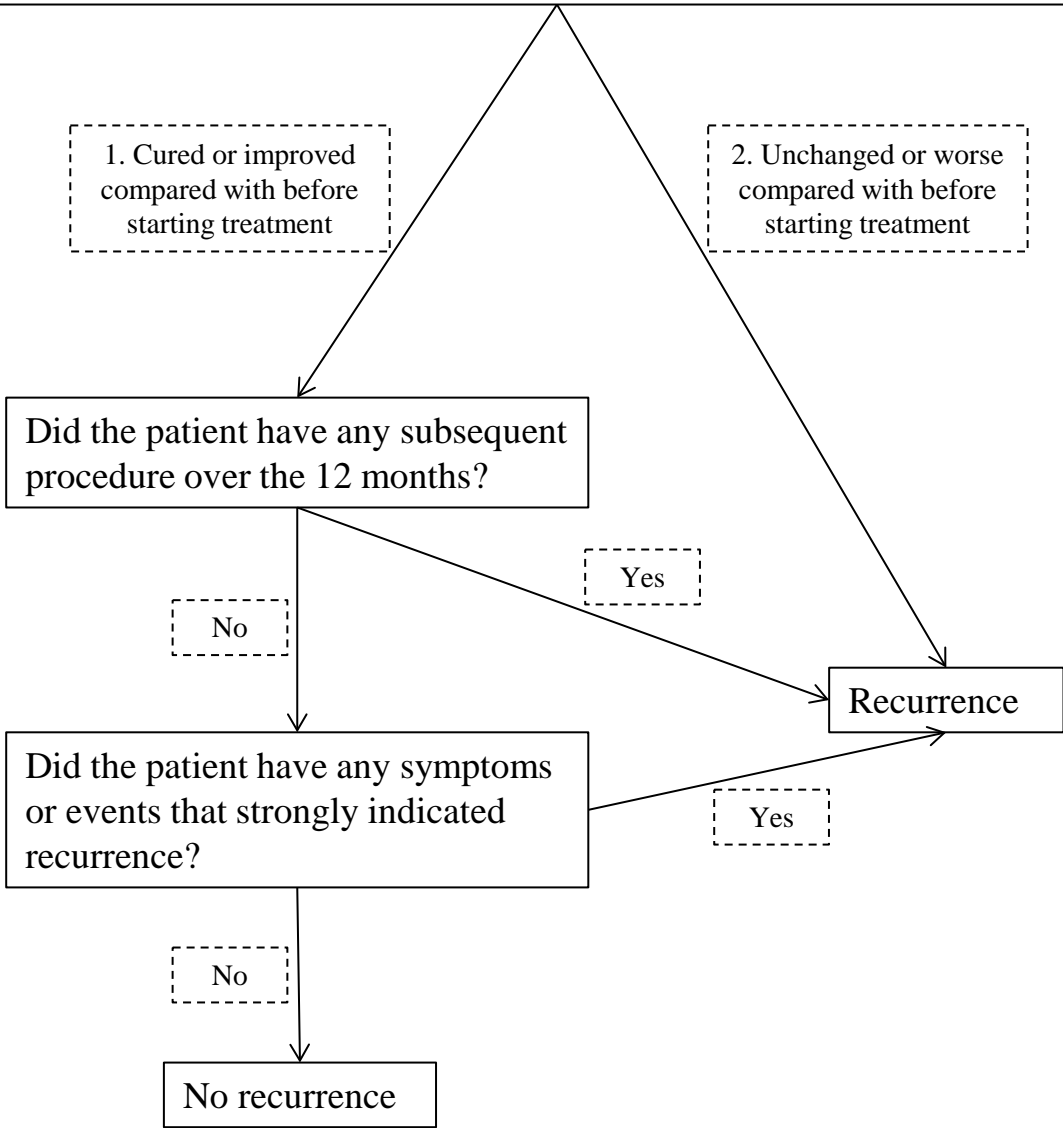

**Web-only information Table 1a – Changes to protocol during trial commencement**

| <b>Changes to Protocol</b>                                                                                                                                                                                                                                                                                                                                                                                                      | <b>Date</b> | <b>Approved by</b>                                      |
|---------------------------------------------------------------------------------------------------------------------------------------------------------------------------------------------------------------------------------------------------------------------------------------------------------------------------------------------------------------------------------------------------------------------------------|-------------|---------------------------------------------------------|
| Protocol version 2.0: Adverse Events were clarified in the protocol and participant information sheet                                                                                                                                                                                                                                                                                                                           | 30/07/2012  | NRES Committee Yorkshire & The Humber - South Yorkshire |
| Protocol version 3.0: Clarified Serious Adverse Event reporting to state that only related Adverse Events and Serious Adverse Events will be reported                                                                                                                                                                                                                                                                           | 30/08/2012  | NRES Committee Yorkshire & The Humber - South Yorkshire |
| Protocol version 4.0: A change was made to the eligibility criteria to exclude patients with hyper-coagulability disorders (in addition to those on Warfarin or Clopidogrel)                                                                                                                                                                                                                                                    | 24/10/2012  | NRES Committee Yorkshire & The Humber - South Yorkshire |
| Protocol version 5.0: The baseline data collection was changed to the day of surgery, rather than at randomisation.                                                                                                                                                                                                                                                                                                             | 07/02/2013  | NRES Committee Yorkshire & The Humber - South Yorkshire |
| Protocol version 6.0: The inclusion criteria 'Either presenting for the first time or after one failure of RBL' was replaced by three exclusion criteria for clarification: 'Patients that have had previous surgery for haemorrhoids (at any time); Patients that have had more than one injection treatment for haemorrhoids in the past 3 years; and Patients that have had more than one RBL procedure in the past 3 years' | 25/03/2013  | NRES Committee Yorkshire & The Humber - South Yorkshire |
| Protocol version 7.0: The sentence 'patients will have at least 24 hours to decide whether to take part' was added to the protocol, to provide clarification.                                                                                                                                                                                                                                                                   | 30/04/2013  | NRES Committee Yorkshire & The Humber - South Yorkshire |
| Protocol version 8.0: A pre-randomisation questionnaire was added to the data collection schedule for participants                                                                                                                                                                                                                                                                                                              | 05/07/2013  | NRES Committee Yorkshire & The Humber - South Yorkshire |

**Web-only information Table 2a - Haemorrhoid symptom scores**

|                                                 | <b>RBL</b>                           | <b>HAL</b>                           | <b>Difference (95% CI)</b> |
|-------------------------------------------------|--------------------------------------|--------------------------------------|----------------------------|
| Randomisation<br>n<br>Mean (SD)<br>Median (IQR) | 83<br>6.5 (3.2)<br>6.0 (4.0 to 8.5)  | 80<br>6.4 (3.4)<br>6.0 (4.0 to 9.0)  |                            |
| Baseline<br>N<br>Mean (SD)<br>Median (IQR)      | 146<br>6.5 (3.3)<br>6.0 (4.0 to 8.0) | 150<br>6.4 (3.0)<br>6.0 (4.0 to 8.5) |                            |
| 6 weeks<br>n<br>Mean (SD)<br>Median (IQR)       | 142<br>4.0 (3.5)<br>3.0 (1.0 to 6.0) | 137<br>3.0 (3.1)<br>2.0 (1.0 to 5.0) | 1.0 (0.3 to 1.8); p=0.01   |
| 12 months<br>n<br>Mean (SD)<br>Median (IQR)     | 131<br>3.6 (3.2)<br>3.0 (1.0 to 5.0) | 123<br>3.6 (3.3)<br>3.0 (1.0 to 5.2) | 0.0 (-0.8, 0.8); p=0.98    |

**Web only information – Vaizey faecal incontinence scores**

|                                                 | <b>RBL</b>                           | <b>HAL</b>                           | <b>Difference (95% CI) p-value</b> |
|-------------------------------------------------|--------------------------------------|--------------------------------------|------------------------------------|
| Randomisation<br>N<br>Mean (SD)<br>Median (IQR) | 84<br>6.0 (5.3)<br>4.0 (1.0 to 10.0) | 88<br>4.9 (4.6)<br>4.0 (2.0 to 7.5)  |                                    |
| Baseline<br>N<br>Mean (SD)<br>Median (IQR)      | 142<br>5.9 (5.2)<br>4.0 (1.0 to 9.0) | 147<br>5.3 (4.8)<br>4.0 (2.0 to 8.0) |                                    |
| 6 weeks<br>N<br>Mean (SD)<br>Median (IQR)       | 137<br>4.0 (4.5)<br>3.0 (0.0 to 6.0) | 132<br>4.1 (4.9)<br>3.0 (0.0 to 6.0) | -0.1 (-1.3 to 1.0); p = 0.86       |
| 1 year<br>N<br>Mean (SD)<br>Median (IQR)        | 118<br>4.0 (4.7)<br>2.0 (0.0 to 6.0) | 107<br>4.5 (4.5)<br>3.0 (1.0 to 7.0) | -0.5 (-1.8 to 0.7); p = 0.38       |
